Centro Cardiologico Monzino, IRCCS, Milan, Italy

## Aims

## Methods and Results

Overall, 58 consecutive patients were included. Ten (17.2%) symptomatic patients underwent ICA according to CCTA findings, while in 48 (82.8%) patients ICA was deferred. No clinical events were recorded after a mean follow-up of  $49.7 \pm 16.8$  days. In nine out of ten patients referred to ICA, severe coronary artery disease was confirmed and treated accordingly. Changes in medical therapy were significantly more prevalent in patients with vs. those without CAD at CCTA.

**Conclusion:** We report a potential pivotal role for CCTA in the triage of non-COVID-19 patients with suspected CAD during the SARS-CoV-2 pandemic. CCTA may be helpful for identifying patients who necessitate ICA, ensuring adequate resource utilization during the pandemic.
